# Supplementary material for: Validation of reference gene stability for normalization of RT-qPCR in Phytophthora capsici Leonian during its interaction with Piper nigrum L
Source: PubMed Central journal article supplement (PMC10973370; doi:10.1038/s41598-024-58139-y), 2024-03-27
Supplement: 41598_2024_58139_MOESM1_ESM.pdf [file 41598_2024_58139_MOESM1_ESM.pdf]

Supplementary information

**Validation of reference gene stability for normalization of RT-qPCR in *Phytophthora capsici* Leonian during its interaction with *Piper nigrum* L.**

**Saranya Vijayakumar<sup>1,2</sup>, and Manjula Sakuntala<sup>1,\*</sup>**

<sup>1</sup>Rajiv Gandhi Centre for Biotechnology, Plant Disease Biology Lab, Thiruvananthapuram, 695014, India

<sup>2</sup>Research Centre, University of Kerala, Thiruvananthapuram, India

[\\*smanjula@rgcb.res.in](mailto:smanjula@rgcb.res.in)

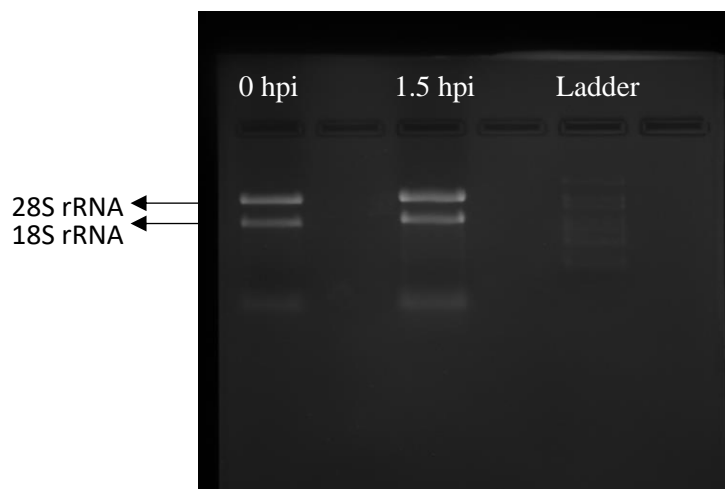

**Supplementary Figure S1.** RNA gel electrophoresis image showing intact RNA. This figure presents a representative image of 1.5% agarose-formaldehyde RNA gel electrophoresis, showcasing intact RNA. The gel image includes samples from 0hpi and 1.5hpi.

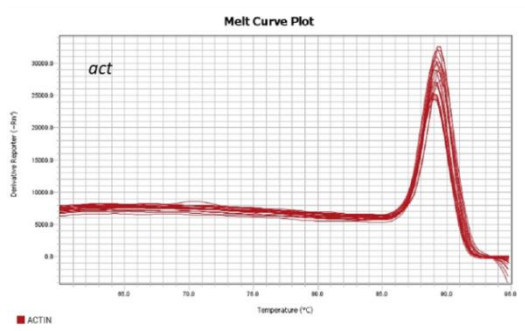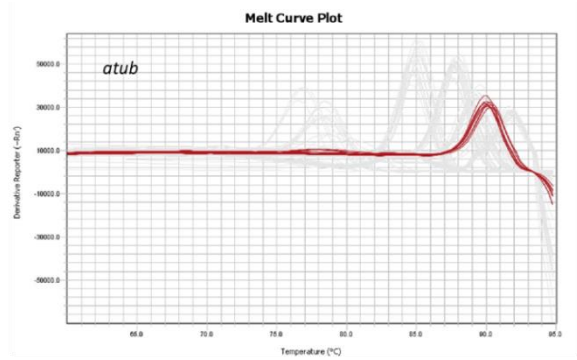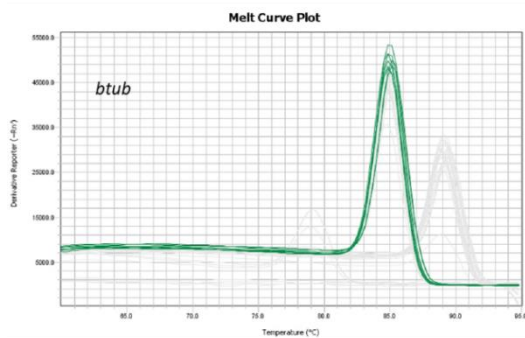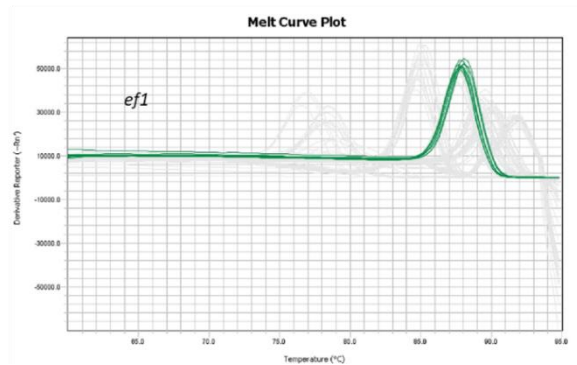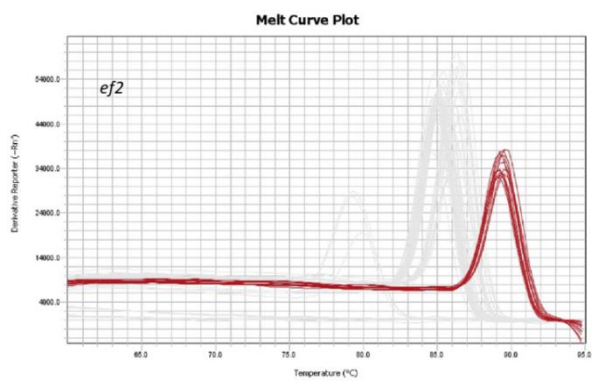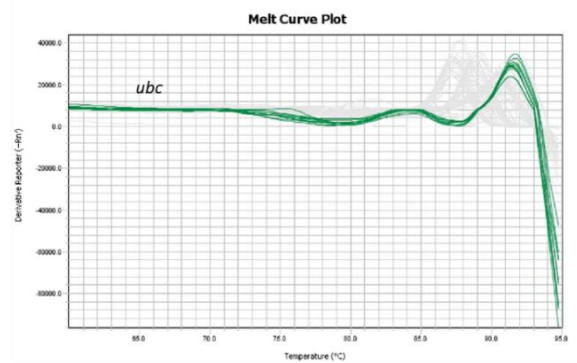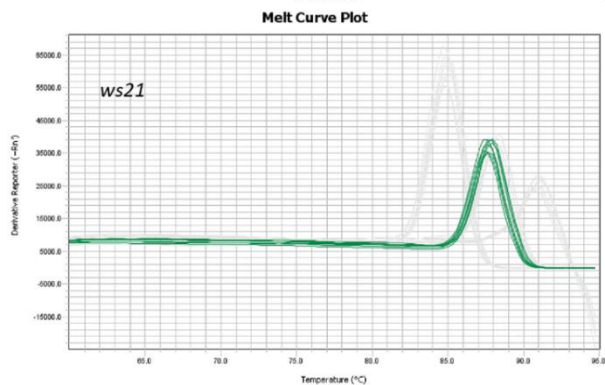

**Supplementary Figure S2.** Melt curve analysis for candidate reference genes. This figure presents the melt curve analysis results for the tested candidate reference genes (actin (*act*),  $\alpha$ -tubulin (*atub*),  $\beta$ -tubulin (*btub*), translation elongation factor 1a (*ef1*), elongation factor 2 (*ef2*), ubiquitin-conjugating enzyme (*ubc*), and 40S ribosomal protein S3A (*ws21*)). The results demonstrate the specificity of primer pairs used.

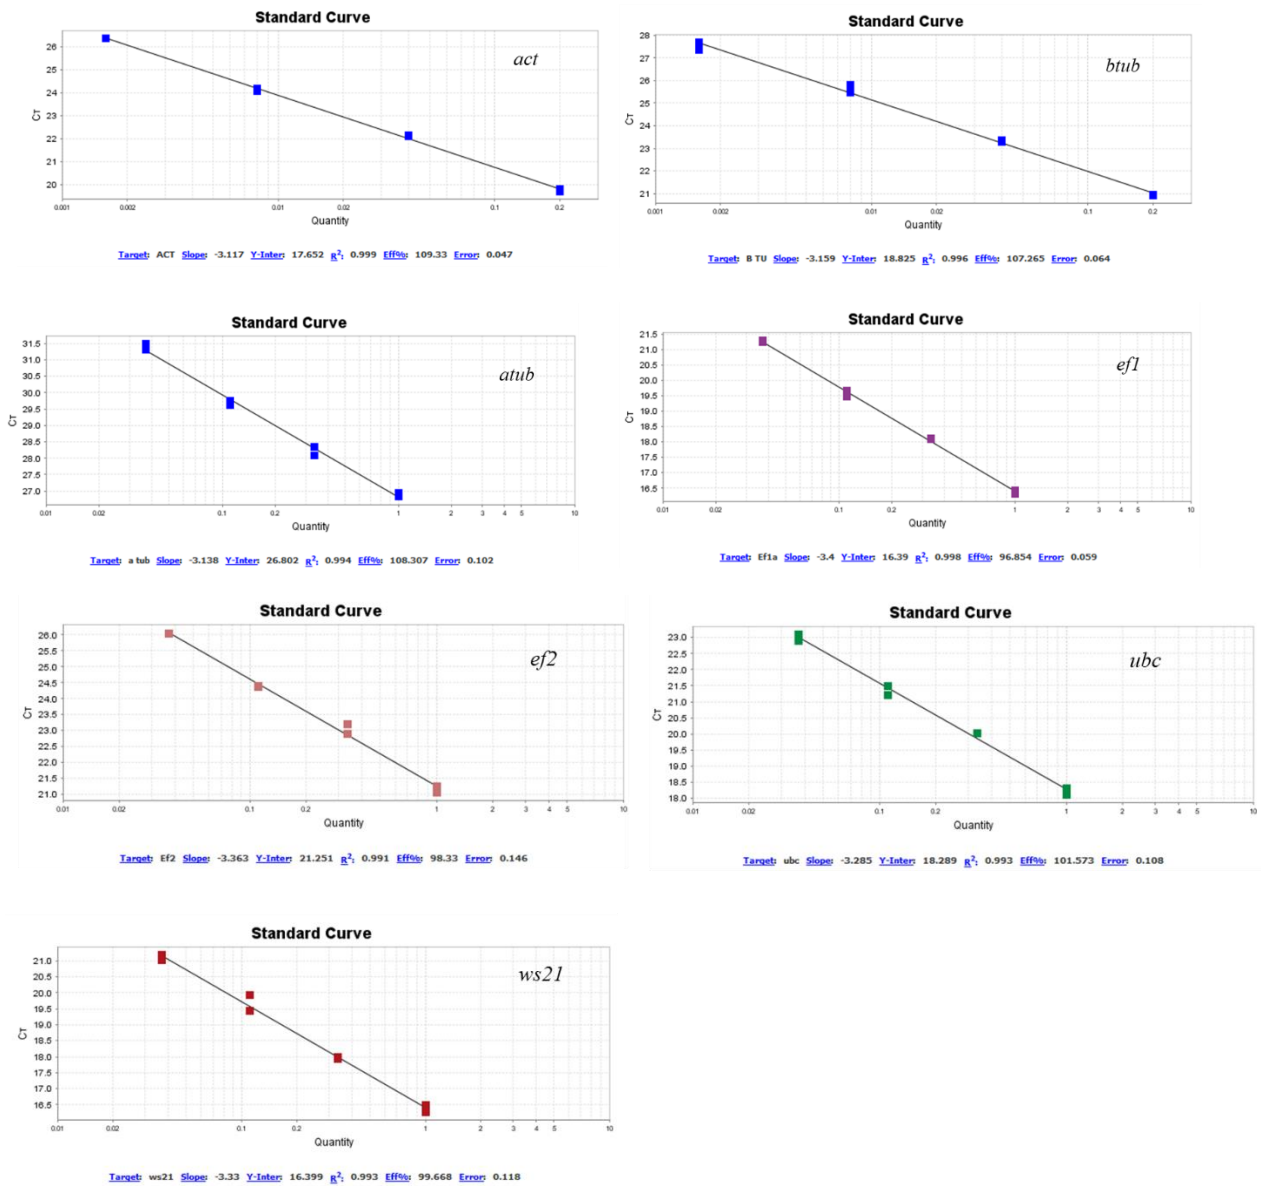

**Supplementary Figure S3.** Standard curves for candidate reference genes. This figure illustrates the standard curves generated for the candidate reference genes (actin (*act*),  $\alpha$ -tubulin (*atub*),  $\beta$ -tubulin (*btub*), translation elongation factor 1 $\alpha$  (*ef1*), elongation factor 2 (*ef2*), ubiquitin-conjugating enzyme (*ubc*), and 40s ribosomal protein S3A (*ws21*)). The slope of each standard curve was calculated to determine the amplification efficiency of the reaction for each primer pairs.

| sample | <i>act</i> | <i>atub</i> | <i>btub</i> | <i>ef1</i> | <i>ef2</i> | <i>ubc</i> | <i>ws21</i> | <i>NPPI</i> |
|--------|------------|-------------|-------------|------------|------------|------------|-------------|-------------|
| 0hpi   | 19.116     | 26.946      | 25.303      | 16.042     | 19.858     | 17.677     | 16.478      | 27.570      |
| 0hpi   | 19.083     | 26.587      | 26.355      | 17.227     | 22.823     | 18.699     | 17.503      | 25.823      |
| 0hpi   | 19.293     | 26.124      | 24.318      | 15.511     | 20.272     | 17.041     | 17.754      | 27.215      |
| 1.5hpi | 19.480     | 27.654      | 26.325      | 16.708     | 21.552     | 17.111     | 17.399      | 26.791      |
| 1.5hpi | 20.173     | 28.190      | 27.171      | 17.580     | 22.669     | 18.141     | 17.528      | 26.201      |
| 1.5hpi | 19.014     | 26.130      | 25.085      | 16.003     | 20.976     | 16.643     | 17.096      | 26.872      |
| 3hpi   | 21.828     | 30.198      | 29.751      | 19.360     | 23.710     | 20.109     | 20.062      | 31.829      |
| 3hpi   | 22.752     | 31.173      | 30.034      | 20.165     | 24.506     | 21.490     | 20.725      | 29.086      |
| 3hpi   | 20.768     | 28.417      | 26.258      | 17.356     | 21.675     | 18.945     | 18.711      | 28.089      |
| 6hpi   | 20.198     | 28.325      | 25.154      | 17.030     | 19.956     | 17.507     | 17.367      | 27.260      |
| 6hpi   | 19.435     | 28.088      | 25.670      | 16.394     | 20.477     | 17.923     | 17.051      | 27.018      |
| 6hpi   | 20.999     | 30.055      | 26.966      | 18.260     | 22.479     | 18.411     | 18.364      | 27.936      |
| 12hpi  | 19.459     | 27.687      | 26.803      | 17.677     | 21.848     | 18.925     | 18.753      | 26.628      |
| 12hpi  | 19.982     | 28.600      | 27.480      | 18.828     | 23.043     | 20.012     | 18.478      | 26.452      |
| 12hpi  | 20.734     | 29.325      | 28.729      | 19.648     | 23.872     | 19.961     | 19.452      | 27.533      |
| 24hpi  | 20.507     | 28.535      | 28.331      | 18.025     | 22.700     | 18.599     | 19.104      | 26.838      |
| 24hpi  | 21.324     | 29.243      | 28.678      | 19.316     | 24.068     | 20.983     | 19.837      | 26.906      |
| 24hpi  | 21.356     | 28.756      | 27.927      | 18.335     | 23.268     | 20.099     | 19.790      | 27.753      |
| 48hpi  | 21.886     | 29.260      | 30.405      | 20.169     | 25.002     | 20.075     | 20.175      | 31.005      |
| 48hpi  | 22.436     | 30.549      | 30.118      | 21.484     | 26.786     | 22.023     | 20.439      | 29.783      |
| 48hpi  | 22.075     | 29.530      | 29.336      | 20.385     | 25.195     | 20.977     | 20.646      | 31.022      |
| zp     | 24.825     | 30.293      | 30.550      | 21.914     | 23.937     | 23.931     | 23.250      | 31.967      |
| zp     | 25.871     | 29.855      | 31.147      | 22.262     | 24.110     | 24.019     | 23.178      | 31.924      |
| zp     | 25.871     | 29.855      | 31.147      | 22.262     | 24.110     | 24.019     | 23.178      | 31.675      |

**Supplementary Table 1.** Cq values of candidate reference genes and pathogenicity-related gene. This table presents the mean Cq values of technical triplicates for seven candidate reference genes and a pathogenicity related gene. The values are reported for three biological replicate groups for the specific experimental conditions used in the study.

| Gene name                 | Gene symbol | Accession number | Primer sequence (5'-3')                                                  | Amplicon length (bp) | Efficiency (%) | T <sub>m</sub> (°C) |
|---------------------------|-------------|------------------|--------------------------------------------------------------------------|----------------------|----------------|---------------------|
| Necrosis inducing protein | <i>NPPI</i> | HM543167         | Forward:<br>GGGTGTCTACGCCTTCATGT<br><br>Reverse:<br>GGGATTTTCCAGTGAGTCCA | 118                  | 102            | 88                  |

**Supplementary Table 2.** Details of *NPPI* primer. This table provides details of primer sequence, amplicon length, amplification efficiency (%) and melting temperature(T<sub>m</sub>) for the target gene *NPPI*.

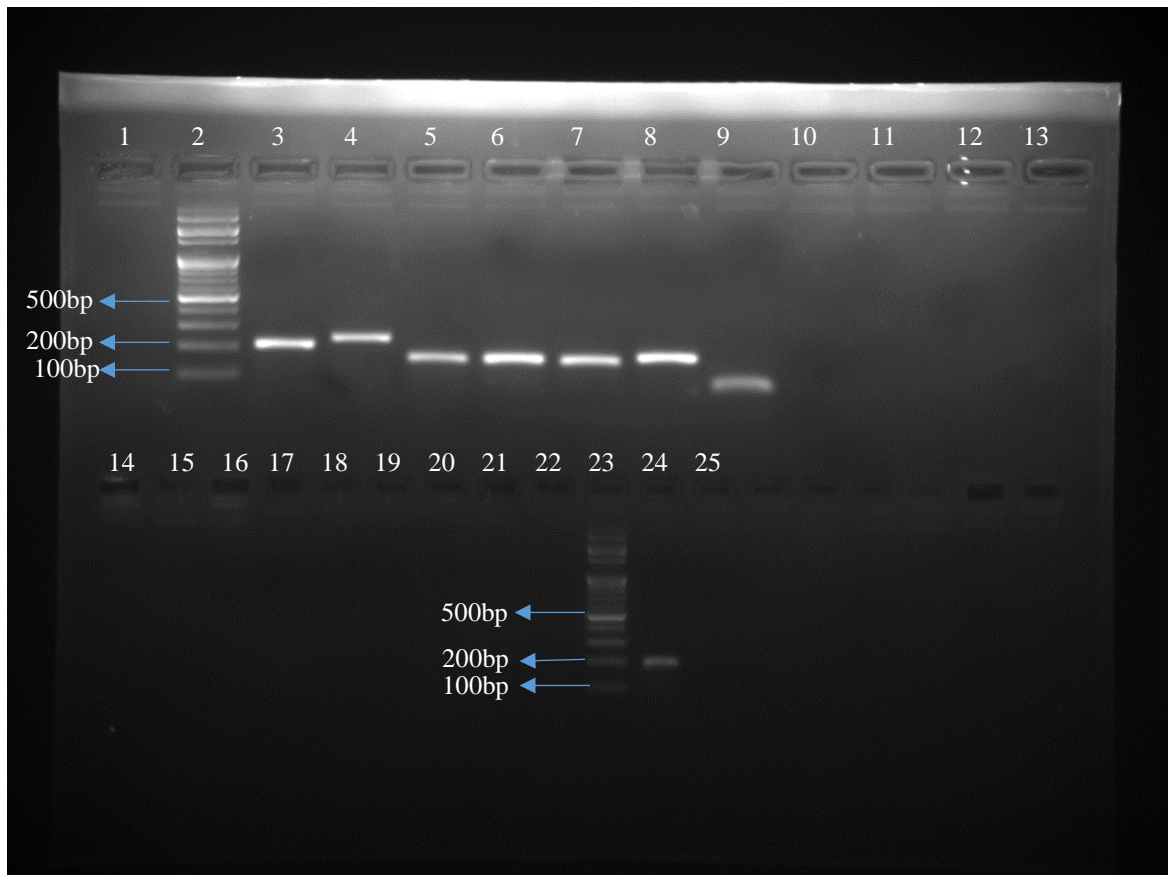

**Supplementary figure 4.** Agarose gel analysis of amplified PCR products from candidate reference genes. This figure displays the 2% agarose gel image depicting the amplified products of the expected size obtained from the primer pairs of candidate reference genes. The gel lane 3 to lane 9 correspond to the following genes in the order: actin (*act*),  $\alpha$ -tubulin (*atub*),  $\beta$ -tubulin (*btub*), translation elongation factor 1 $\alpha$  (*efl*), elongation factor 2 (*ef2*), ubiquitin-conjugating enzyme (*ubc*), and 40s ribosomal protein S3A (*ws2l*). The target gene *NPP1* is shown in the lane 24. Lanes 14 to 20 represents the no template controls (NTC) for the seven reference genes and, lane 25 represents the NTC for the *NPP1* gene. Lanes 2 and 23 correspond to 100bp DNA ladder.
